# Supplementary material for: IL-17 promotes IL-18 production via the MEK/ERK/miR-4492 axis in osteoarthritis synovial fibroblasts
Source: publisher site journal article supplement (doi:10.18632/aging.205462), 2024-01-22
Supplement: Supplementary file [file aging-v16i2-205462-supplementary-material-SD1.pdf]

SUPPLEMENTARY FIGURES

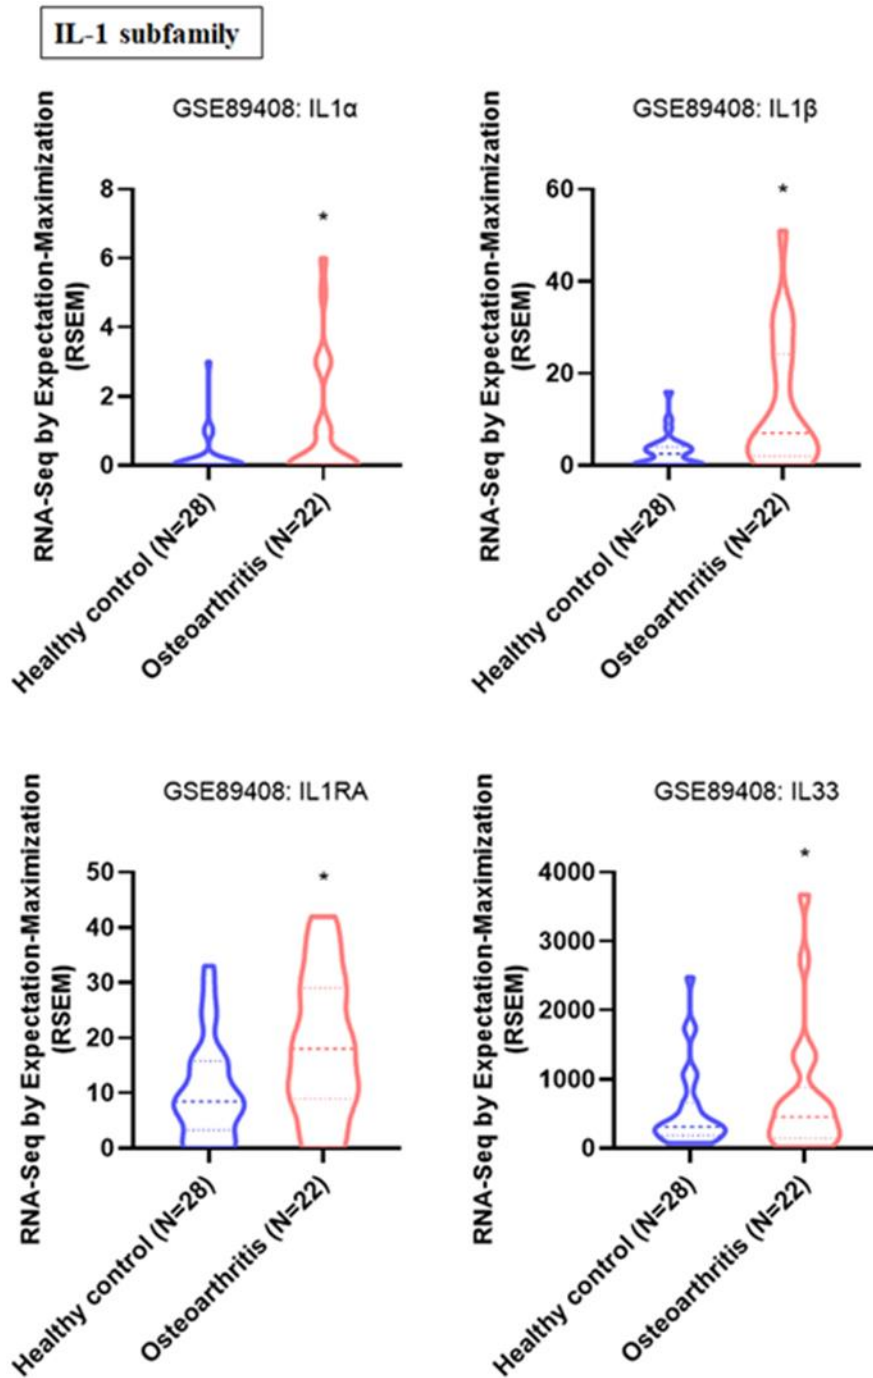

**Supplementary Figure 1. IL-1 family members and its receptor are up-regulated in specimens of OA patients.** The GEO dataset (GSE890408) contained mRNA expression pattern from the synovial tissues of OA patients and normal donors were used to analyze IL-1 $\alpha$ , IL-1 $\beta$ , IL-33 and IL-RA expressions. Results are expressed as the means  $\pm$  S.D. \*  $p < 0.05$  compared with controls.

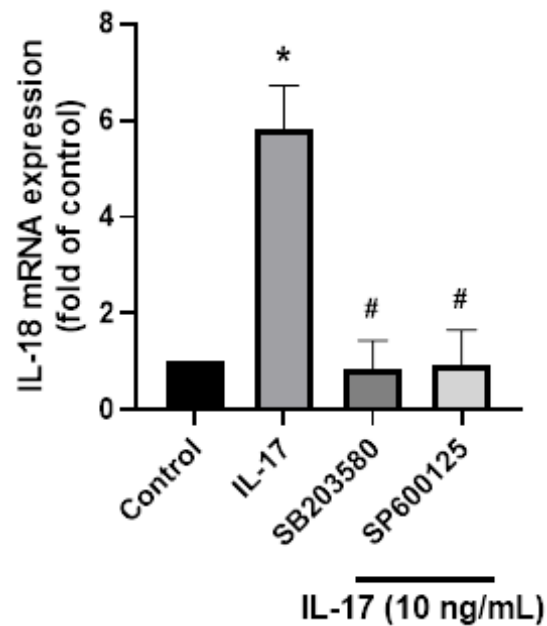

**Supplementary Figure 2. IL-17-induced promotion of IL-18 production in OASFs requires p38 and JNK signaling.** OASFs were pretreated with p38 and JNK inhibitors SB203580 (5  $\mu$ M) or SP600125 (5  $\mu$ M) for 1 h, then incubated with IL-17 (10 ng/mL) for 24 h. IL-18 expression was determined by qPCR. Results are expressed as the means  $\pm$  S.D. \*  $p < 0.05$  compared with controls; #  $p < 0.05$  compared with the IL-17-treated group.

| Ensembl Gene Id           | miRNA name   | miTG score        | Also Predicted           |
|---------------------------|--------------|-------------------|--------------------------|
| 1 ENSG00000100030 (MAPK1) | hsa-miR-4492 | 0.885935706270861 | <input type="checkbox"/> |

Gene details <sup>ⓘ</sup>  
miRNA details <sup>ⓘ</sup>  
pubMed links: [miRNA](#) | [gene](#) | [both](#)  
UCSC graphic <sup>ⓘ</sup>

| Region | Binding Type | Transcript position | Score               | Conservation |
|--------|--------------|---------------------|---------------------|--------------|
| UTR3   | 7mer         | 9659-9675           | 0.015976824446552   | 5            |
| UTR3   | 6mer         | 9542-9548           | 0.00296085739835613 | 2            |
| UTR3   | 7mer         | 9282-9306           | 0.012355223162973   | 4            |
| UTR3   | 6mer         | 7818-7835           | 0.00163176721363082 | 2            |
| UTR3   | 8mer         | 7690-7711           | 0.00147332894034286 | 2            |
| UTR3   | 6mer         | 695-714             | 0.00271090948120946 | 2            |
| UTR3   | 6mer         | 309-337             | 0.0032522213901444  | 2            |
| UTR3   | 6mer         | 92-110              | 0.00384781608633246 | 1            |

**Supplementary Figure 3. Prediction result of mir-4492 binding to ERK (MAPK1) 3'UTR using the DIANA-microT-CDS tool.** The online database for miRNA target prediction (DIANA-microT-CDS) was utilized to predict miR-4492, which is a potential target for ERK mRNA.
